# Supplementary material for: MicroRNAs control de novo DNA methylation through regulation of transcriptional repressors in mouse embryonic stem cells
Source: Springer Nature journal article supplement (doi:10.1038/nsmb.1391), 2008-03-01
Supplement: 41594_2008_BFnsmb1391_MOESM8_ESM.pdf [file 41594_2008_BFnsmb1391_MOESM8_ESM.pdf]

# MicroRNAs control *de novo* DNA methylation through regulation of transcriptional repressors in mouse embryonic stem cells

Lasse Sinkkonen, Tabea Hugenschmidt, Philipp Berninger, Dimos Gaidatzis, Fabio Mohn, Caroline G. Artus-Revel, Mihaela Zavolan, Petr Svoboda, and Witold Filipowicz

## Sinkkonen et al. Supplementary Figure 1

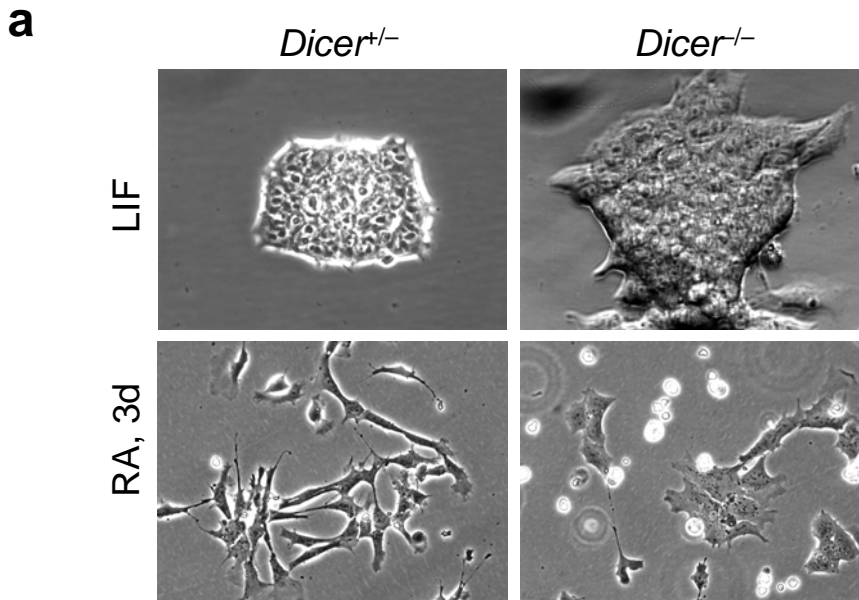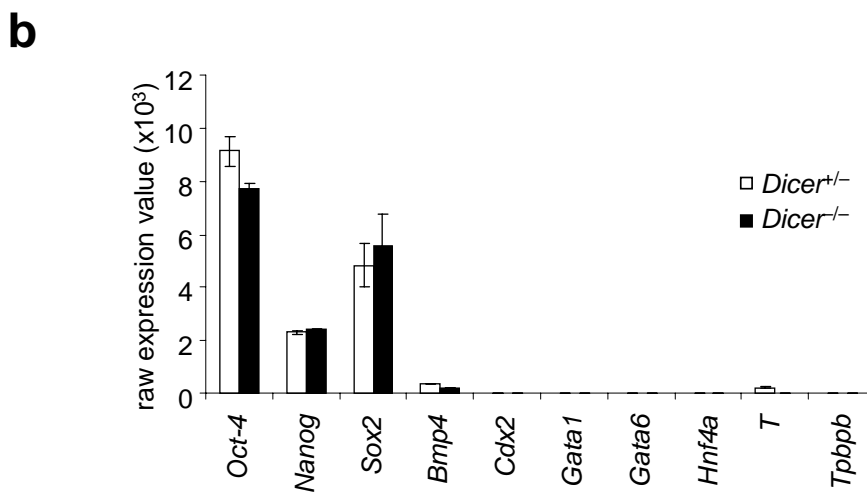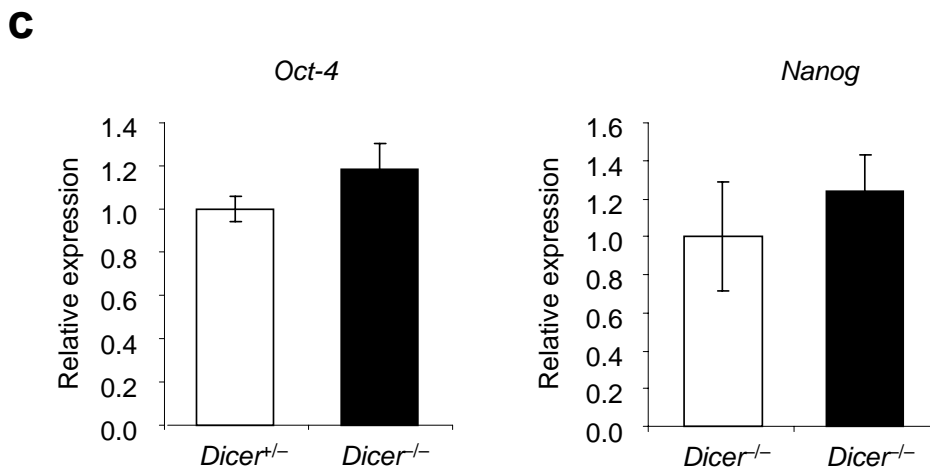

**Supplementary Figure 1.** Characterization of the differentiation status of *Dicer*<sup>+/-</sup> and *Dicer*<sup>-/-</sup> ES cells.

(a) Light microscopy images of undifferentiated cells (cells grown in the presence of LIF) and cells subjected to the differentiation treatment (grown for 3 days in the presence of 100 nM RA, in the absence of LIF; RA, 3 d). (b) Levels of mRNAs encoding core pluripotency and differentiation markers. Microarray analysis was performed with RNA isolated from undifferentiated *Dicer*<sup>+/-</sup> and *Dicer*<sup>-/-</sup> ES cells. Raw data were calculated as described in Materials and Methods. Median raw values ( $\pm$  s.d.) for each gene were taken from probe sets with the strongest hybridization signal. Other probe sets for the same genes also did not show significant differences in expression levels between *Dicer*<sup>+/-</sup> and *Dicer*<sup>-/-</sup> cells. Displayed differentiation markers were either used in a previous analysis of *Dicer*<sup>-/-</sup> ES cells [*T* (brachyury), *Hnf4a*, *Gata1*, *Bmp4*]<sup>7</sup> or were culled from published articles (*Tpbpb*, *Cdx2*, *Gata6*)<sup>8,9</sup>. These markers are indicative of the presence of cells of trophoctodermal (*Tpbpb*, *Cdx2*), extraembryonic endodermal (*Gata6*), embryonic mesodermal (brachyury, *Bmp4*, *Gata1*, *Gata6*), and embryonic endodermal (*Hnf4a*, *Gata6*) lineages. It is not known why *Dicer*<sup>+/-</sup> cells show a low microarray hybridization signal of brachyury. Possibly, a small fraction of cells spontaneously initiates differentiation. However, other mesodermal markers such as *Gata1* and *Gata6* remained absent. Detectable microarray hybridization signal for *Bmp4* has been previously reported for undifferentiated ES cells (GEO database, and<sup>10</sup>). (c) RT-qPCR analysis of *Oct-4* and *Nanog* mRNA levels confirms results of microarray analysis. Values, normalized to *Gapdh* expression, represent means ( $\pm$  s.e.m.) of at least 3 independent experiments.



**Supplementary Figure 2.** Characterization of expression of the miR-290 cluster.

(a) Structure of the miR-290 locus and sequences of the miR-290 cluster miRNAs. The upper scheme depicts structure of the cluster. Shown is a 4 kb fragment from the chromosome 7 genomic contig NT\_039413.7 (from 217,800 to 221,800) with relative positions of individual miRNAs and orientation of the pri-miRNA transcript. The orange line represents a region covered by oligonucleotide probes from the Affymetrix probe set 1444292\_at, which detects pri-miRNA of the miR-290 cluster. Below the map is a ClustalW alignment of pre-miRNAs, which was downloaded from the miRbase<sup>1</sup> and edited using Genedoc alignment editor (<http://www.psc.edu/biomed/genedoc>). Blue lines represent mature miRNA sequences from the ascending (5p) strand and red lines from the descending (3p) strand of the pre-miRNA hairpin. Pre-miRNAs of the miR-290 cluster yield mature miRNAs primarily from descending (3p) hairpin strands. According to Landgraf et al.<sup>6</sup>, the 5p strands also produce mature miRNAs but they represent only 13% of miRNAs generated from the cluster. Note that despite being expressed, not all mature miRNA sequences depicted here can be found in the current version of the miBase (9.2).

(b) Quantification of the miR-290 cluster primary transcript, followed using the microarray probe 1444292\_at, indicates that the cluster is expressed zygotically. The region of the primary transcript covered by the 1444292\_at probe set is indicated in panel a. The analysis was performed using previously published microarray data<sup>11</sup>. Raw data were calculated as described previously<sup>12</sup>. Median raw values ( $\pm$  s.d.; n = 4) are shown.

(c) The miR-290 cluster primary transcript is strongly down-regulated in *Dicer*<sup>-/-</sup> ES cells (two-tailed t-test: p = 0.0053). Expression of the primary transcript was followed using the microarray probe 1444292\_at as described in panel a. The mean expression value ( $\pm$  s.d.; n = 3) in *Dicer*<sup>+/-</sup> cells was set to one.

(d) Levels of the mir-290 cluster miRNAs are down-regulated in *Dicer*<sup>-/-</sup> cells. Total RNA extracted from either *Dicer*<sup>+/-</sup> or *Dicer*<sup>-/-</sup> cells was analyzed on miRCURY<sup>TM</sup> LNA arrays, following the manufacturer's protocol ([www.exiqon.com](http://www.exiqon.com)). Values calculated for *Dicer*<sup>+/-</sup> cells were set as one. The figure shows expression levels of only 3p miRNAs of miR-290 cluster, which were reliably identified as present in the analyzed RNA samples. The 3p miRNAs represent 87% of all miRNAs generated from the cluster<sup>6</sup>. miR-290-3p is not shown since the Exiqon array does not contain a probe for its detection.

# Sinkkonen et al. Supplementary Figure 3

**a**

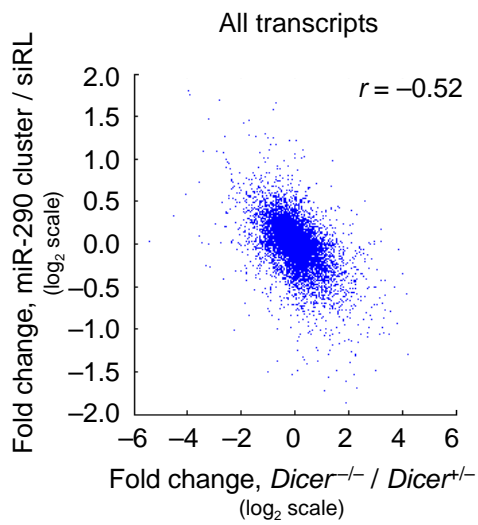

**b**

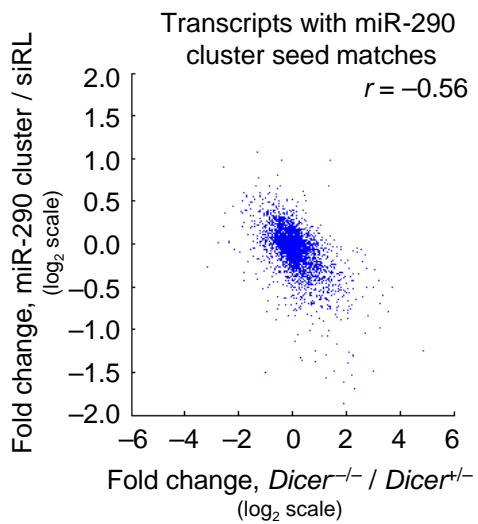

**c**

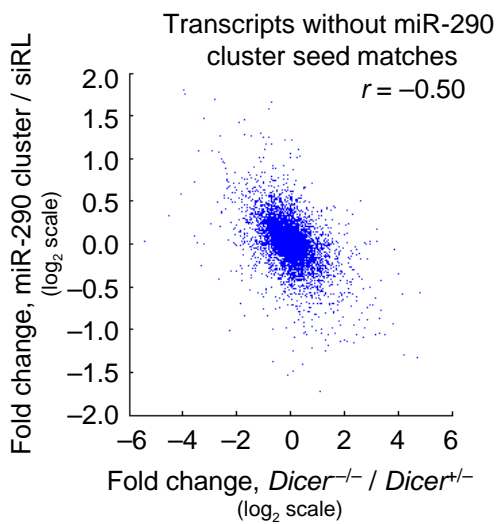

**Supplementary Figure 3.** Relationship between the expression changes in the *Dicer*<sup>-/-</sup> vs. *Dicer*<sup>+/-</sup> (x-axis) and miR-290s-transfected vs siRL-transfected *Dicer*<sup>-/-</sup> ES cells (y-axis). Each dot corresponds to a single transcript, and the panels represent: (a) all transcripts; (b) transcripts with at least one 7-mer match to one of the 1-8 positions of the miRNAs in the 290 cluster in their 3'-UTRs; and (c) transcripts with no 7-mer match to any of the miRNAs of the 290 cluster in their 3'-UTRs. The correlation coefficients are indicated in each panel.

# Sinkkonen et al. Supplementary Figure 4

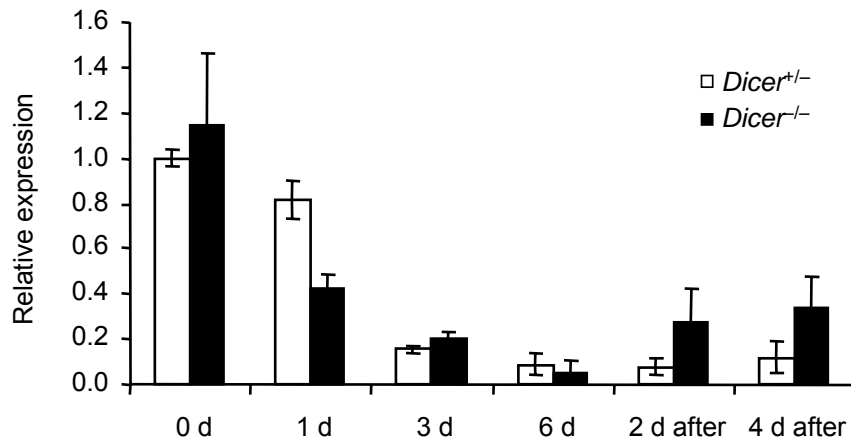

**Supplementary Figure 4.** RT-qPCR analysis of *Nanog* expression during the RA-induced differentiation for 0, 1, 3, or 6 days (0 d, 1 d, 3 d, 6 d), and after returning the cells to the LIF-containing medium devoid of RA for up to 4 additional days (2 d after, 4 d after). Values, normalized to GAPDH expression, represent means ( $\pm$  s.e.m.) of at least 3 independent experiments. Expression in control *Dicer*<sup>+/-</sup> cells at 0d time point was set as 1.



Sinkkonen et al.  
Supplementary  
Figure 5

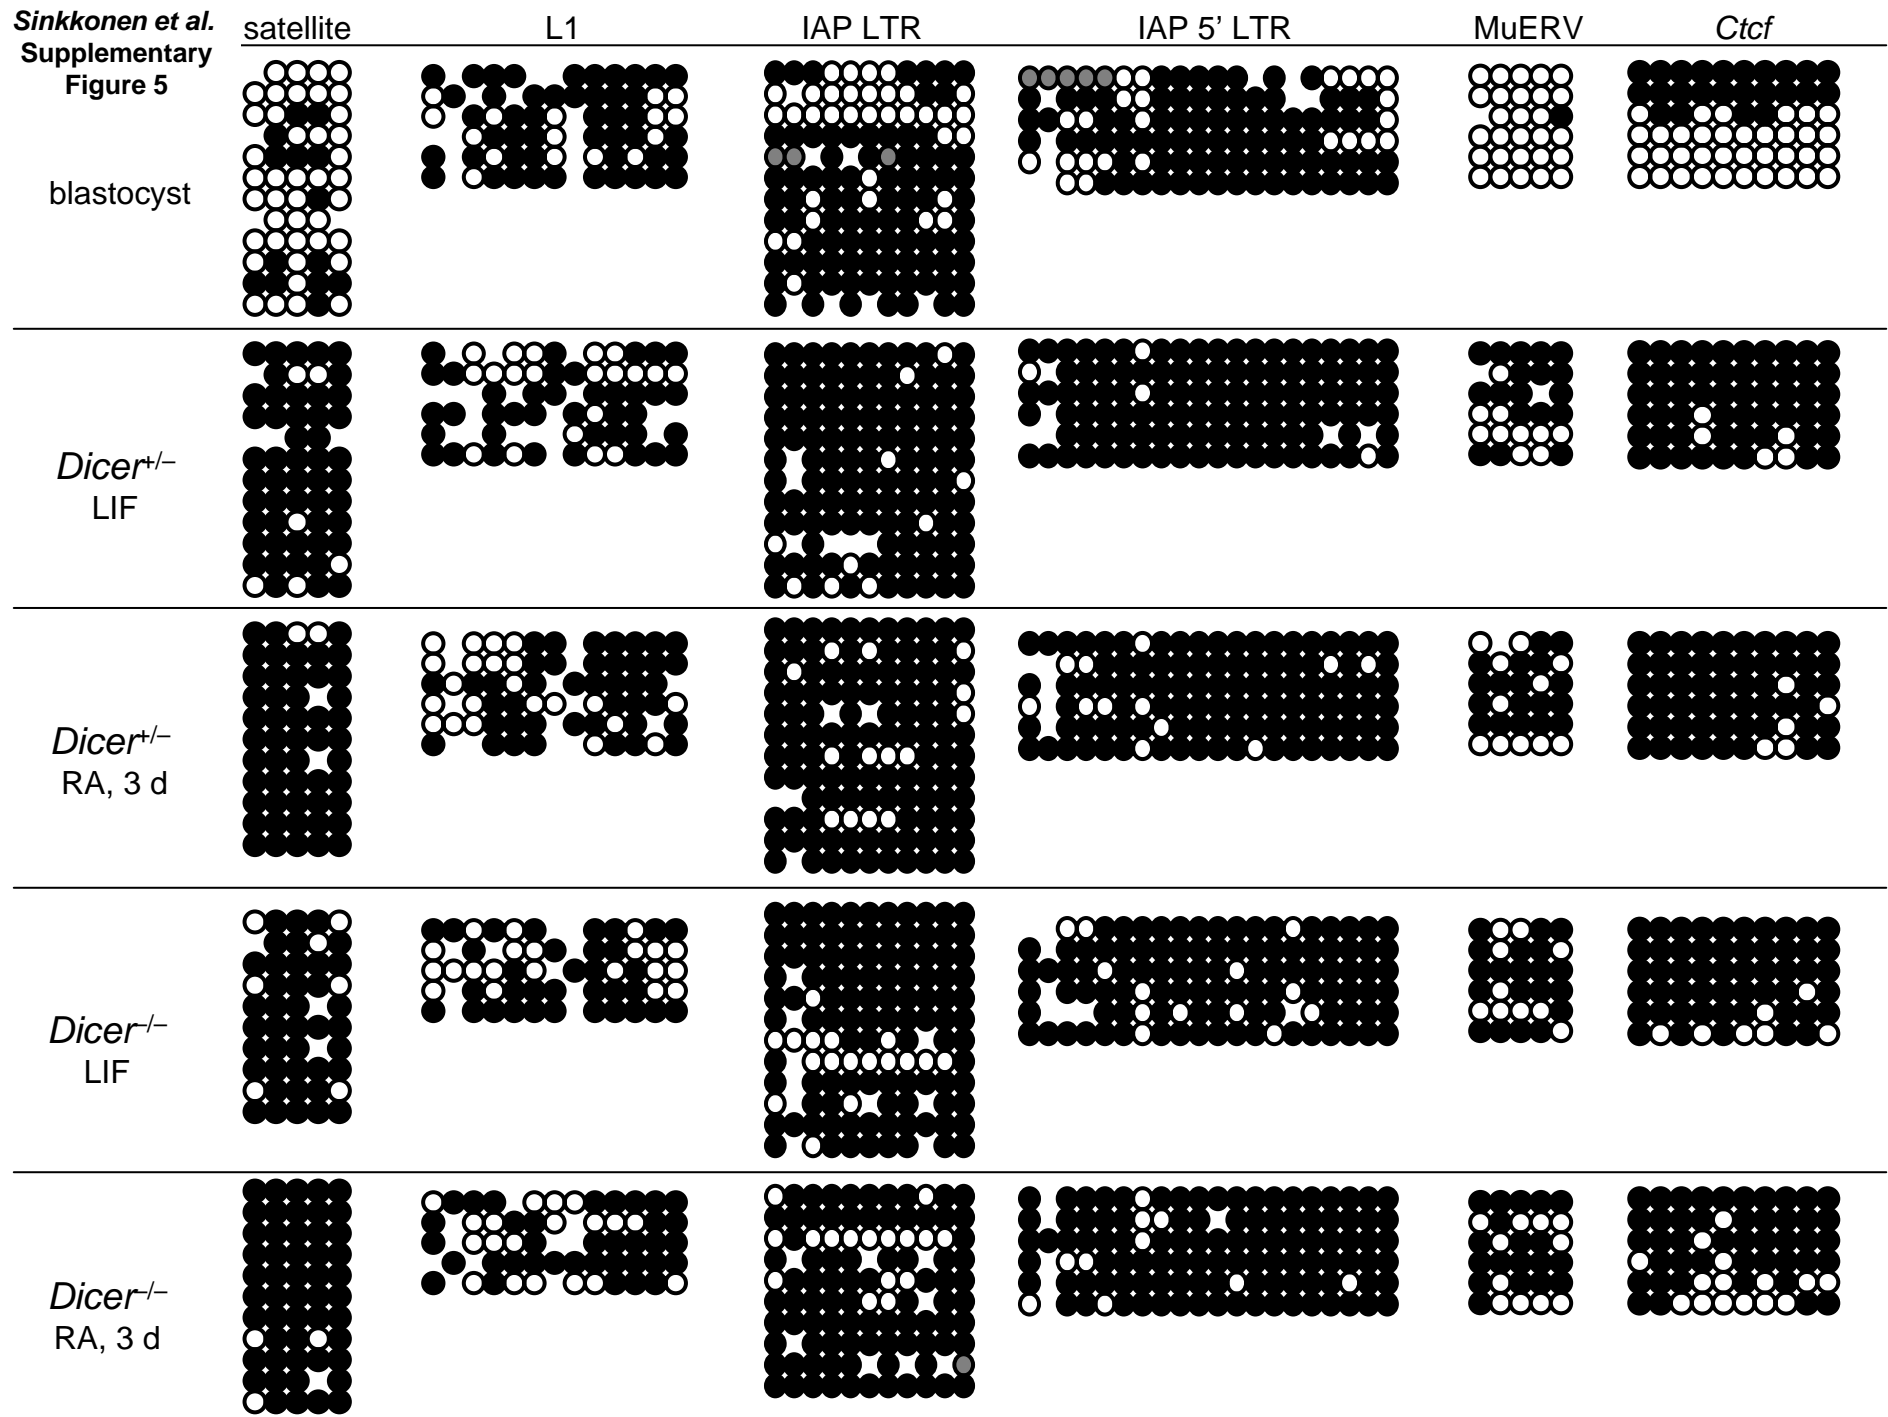

**Supplementary Figure 5.** Maintenance DNA methylation is not affected in *Dicer*<sup>-/-</sup> ES cells. Bisulfite analysis shows the same methylation pattern in undifferentiated and differentiated *Dicer*<sup>-/-</sup> and *Dicer*<sup>+/-</sup> ES cells for typical targets of DNA methylation: repetitive DNA and a body of a gene<sup>13</sup>. DNA methylation of tandemly arrayed repeat sequences (centromeric satellite), interspersed LTR retrotransposon sequences (IAP and MuERV-L), interspersed non-LTR transposon sequences (L1), and a single copy gene sequence (CTCF, exon 9) were analyzed. In the case of IAP, also its 5' LTR sequence, which serves as a promoter for the retrotransposon, was analyzed. The exon 9 sequence of the CTCF gene is hypermethylated in numerous tissues<sup>14</sup>. The ES cell DNA samples used to obtain the data were the same as those described in Fig. 6. Blastocyst DNA samples served as a control providing the DNA methylation status prior to establishment of ES cells. The blastocyst DNA was obtained from a pool of 30 blastocysts from uteri of C57BL/6 female mice. An equivalent of three blastocysts was used for each PCR reaction. Black dots represent methylated and white dots non-methylated CpGs. Sites for which the methylation status was not certain are in grey. Average percentages of the methylated CpG sites for ES cell samples range from 89 to 97 % for satellite repeat, 62 to 70 % for L1, 84 to 92 % for IAP LTR, 90 to 97 % for IAP 5'LTR, 62 to 67 % for MuERV, and 75 to 92 % for *Ctcf*.

**Sinkkonen et al. Supplementary Figure 6**

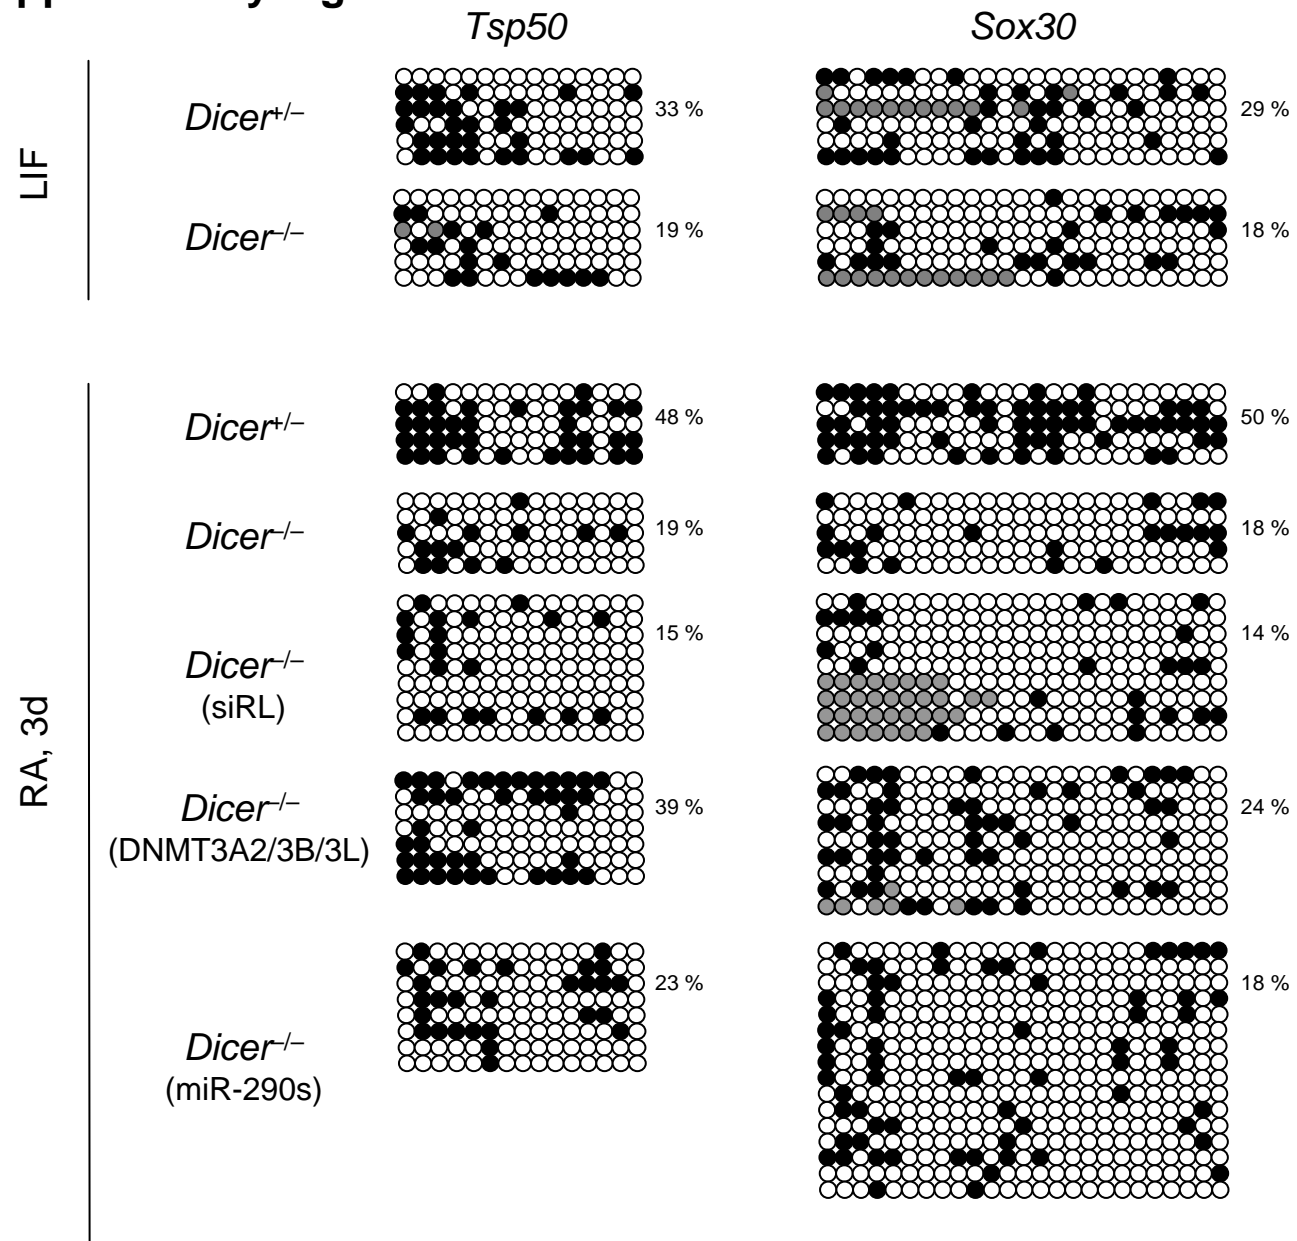

**Supplementary Figure 6.** Analysis of *de novo* DNA methylation of promoters of testis-specific genes *Tsp50* and *Sox30*, which are transcriptionally silent in undifferentiated ES cells and acquire DNA methylation during differentiation in the presence of RA. The promoter regions, upstream of the *Tsp50* and *Sox30* transcription start sites, were analyzed in *Dicer*<sup>+/-</sup> ES cells, *Dicer*<sup>-/-</sup> ES cells, *Dicer*<sup>-/-</sup> ES cells co-transfected with plasmids expressing EGFP-DNMT3a2, EGFP-DNMT3b, and EGFP-DNMT3L, *Dicer*<sup>-/-</sup> ES cells transfected with miR-290 cluster miRNA mimics, and *Dicer*<sup>-/-</sup> ES cells transfected with siRL. Cells were cultured in presence of LIF and without RA (LIF) or differentiated for 3 days with RA in the absence of LIF (RA, 3 d). Each row of dots represents CpGs in one sequenced clone. Black dots represent methylated and white dots non-methylated CpGs. Sites for which the methylation status was not certain are in grey. Average percentages of the methylated CpG sites are indicated.

# Sinkkonen et al. Supplementary Figure 7

**a**

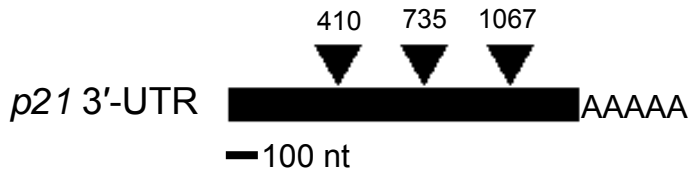

**b**

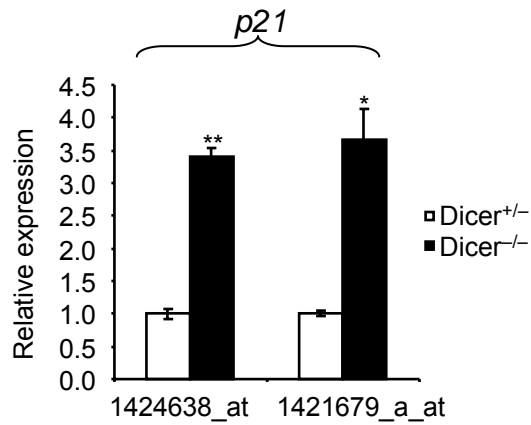

**c**

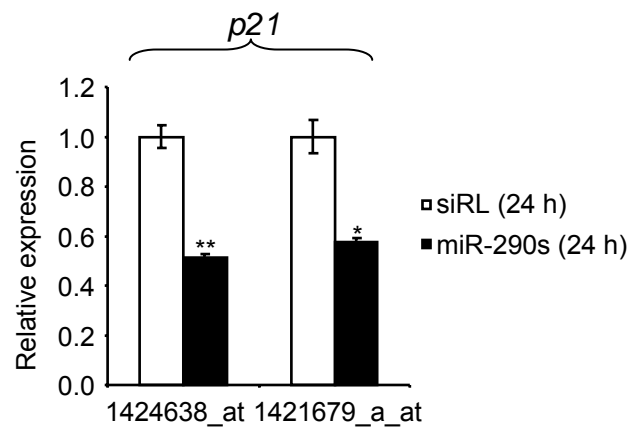

**d**

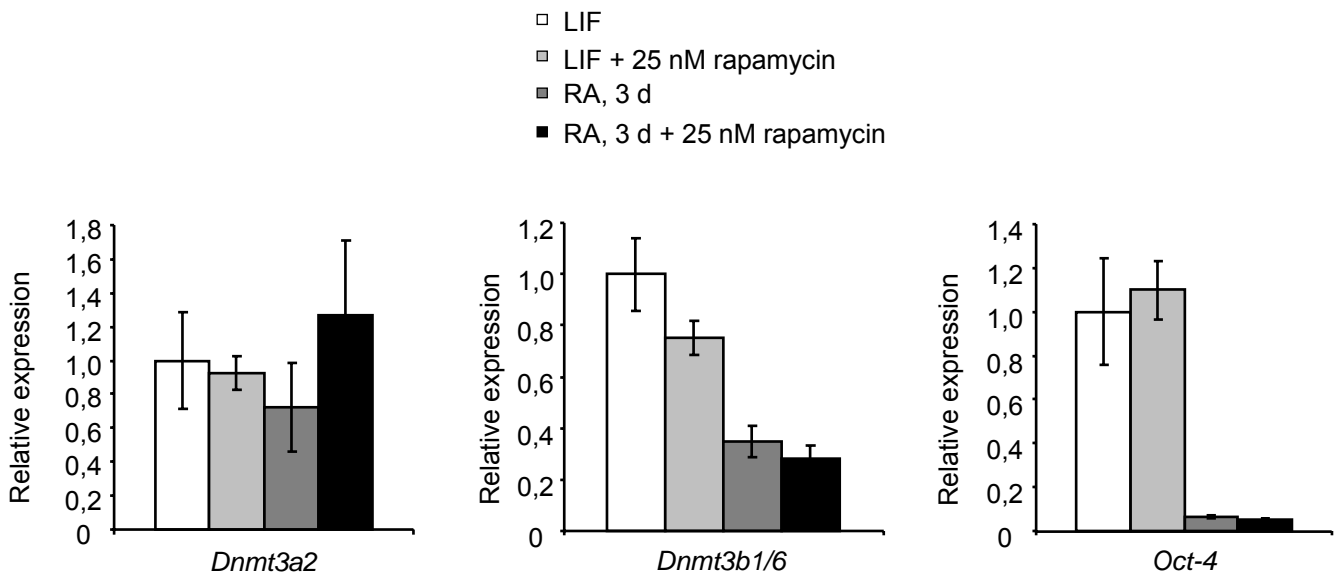

**Supplementary Figure 7.** (a,b,c) *p21* is up-regulated in *Dicer*<sup>-/-</sup> ES cells and down-regulated in response to transfection of miR-290s. (a) Schematic representation of localization of predicted binding sites for AAGUGC-seed containing miRNAs in 3'-UTR of *p21* mRNA are marked with black triangles. (b) The level of *p21* mRNA is up-regulated in *Dicer*<sup>-/-</sup> cells. RNA isolated from *Dicer*<sup>+/-</sup> and *Dicer*<sup>-/-</sup> cells was analyzed by Affymetrix microarrays. The probe sets detecting expression of *p21* mRNA are indicated. Mean expression value ( $\pm$  s.d.; n = 3) in *Dicer*<sup>+/-</sup> cells was set to 1. The two-tailed t-test p-values were 0.0021 and 0.0120. (c) Transfection of miR-290s to *Dicer*<sup>-/-</sup> ES cells down-regulates the level of *p21* mRNA. Cells were transfected with either a mixture of the miR-290 cluster miRNAs or siRL used as a control. RNA was isolated 24 h after transfection. Mean expression value ( $\pm$  s.d.; n = 3) in siRL transfected cells was set to 1. The two-tailed t-test p-values were 0.0012 and 0.0070. (d) Expression of *Dnmt3a2* and *Dnmt3b* is independent of the growth rate of the *Dicer*<sup>+/-</sup> ES cells. *Dicer*<sup>+/-</sup> ES cells were cultured with or without 25 nM rapamycin and differentiated for three days with RA in the absence of LIF (RA, 3 d). mRNA levels of *Dnmt3a2*, *Dnmt3b* and *Oct-4* were analyzed by RT-qPCR. Expression ( $\pm$  s.d.; n = 3) was normalized to that of *Gapdh* and is shown relative to corresponding samples cultured in the presence of LIF without rapamycin, whose expression values were set to 1.

*Sinkkonen et al.* SUPPLEMENTARY TABLES

**Supplementary Table 1.** Motifs most significantly enriched in 3'-UTRs of mRNAs up-regulated in *Dicer*<sup>-/-</sup> ES cells or down-regulated in *Dicer*<sup>-/-</sup> ES cells transfected with miRNAs of the miR-290 cluster.

Enrichments of the 7-mers were analyzed as described in Materials and Methods. Shown are the motifs most significantly (posterior probability > 0.99) enriched in 3'-UTRs of mRNAs up-regulated in *Dicer*<sup>-/-</sup> ES cells or down-regulated in *Dicer*<sup>-/-</sup> ES cells transfected with miRNAs of the miR-290 family. For each motif, the sequence of the motif, posterior probability of the enrichment, occurrence of the motif among up- or down-regulated 3'-UTRs, and the enrichment of the motif are shown. For motifs that are complementary to sequences within miRNAs, the names and sequences of the matching miRNAs are also shown. Sequences complementary to the enriched motif are in capitals. A number of top scoring 7-mer motifs enriched in 3'-UTRs of mRNAs down-regulated upon transfection of miR-290 cluster miRNAs contain seven or six U residues. The significance of these motifs and their enrichment is unknown.

**Supplementary Table 1 - Significantly enriched motifs (posterior probability > 0.99)**

| Motifs enriched in transcripts upregulated in Dicer -/- cells |                       |            |            | Position | miRNA           | Sequence of miRNA        |
|---------------------------------------------------------------|-----------------------|------------|------------|----------|-----------------|--------------------------|
| Motif                                                         | Posterior probability | Occurrence | Enrichment |          |                 |                          |
| GCACUUU                                                       | 0.9999999999          | 489        | 1.615      |          |                 |                          |
|                                                               |                       |            |            | (2-8)    | mmu-miR-17-5p   | cAAAGUGCuuacagugcagguagu |
|                                                               |                       |            |            | (1-7)    | mmu-miR-291a-3p | AAAGUGCuccacuuugugugcc   |
|                                                               |                       |            |            | (2-8)    | mmu-miR-93      | cAAAGUGCuguucgugcagguag  |
|                                                               |                       |            |            | (2-8)    | mmu-miR-20b     | cAAAGUGCucauagugcaggua   |
|                                                               |                       |            |            | (1-7)    | mmu-miR-291b-3p | AAAGUGCauccauuuuguuuguc  |
|                                                               |                       |            |            | (2-8)    | mmu-miR-106b    | uAAAGUGCugacagugcagau    |
|                                                               |                       |            |            | (2-8)    | mmu-miR-106a    | cAAAGUGCuaacagugcaggua   |
|                                                               |                       |            |            | (2-8)    | mmu-miR-20a     | uAAAGUGCuuauagugcagguag  |
|                                                               |                       |            |            | (1-7)    | mmu-miR-294-3p  | AAAGUGCuuccuuuugugugu    |
|                                                               |                       |            |            | (1-7)    | mmu-miR-295-3p  | AAAGUGCucacuacuuuugagucu |
| AGCACUU                                                       | 0.9999999994          | 545        | 1.495      |          |                 |                          |
|                                                               |                       |            |            | (3-9)    | mmu-miR-17-5p   | caAAGUGCuuacagugcagguagu |
|                                                               |                       |            |            | (1-7)    | mmu-miR-302b    | AAGUGCuucauguuuuaguag    |
|                                                               |                       |            |            | (2-8)    | mmu-miR-291a-3p | aAAGUGCuccacuuugugugcc   |
|                                                               |                       |            |            | (3-9)    | mmu-miR-93      | caAAGUGCuguucgugcagguag  |
|                                                               |                       |            |            | (3-9)    | mmu-miR-20b     | caAAGUGCucauagugcaggua   |
|                                                               |                       |            |            | (1-7)    | mmu-miR-302d    | AAGUGCuucauguuuugagugu   |
|                                                               |                       |            |            | (2-8)    | mmu-miR-302c    | cAAGUGCuucauguuucagugg   |
|                                                               |                       |            |            | (3-9)    | mmu-miR-106b    | uaAAGUGCugacagugcagau    |
|                                                               |                       |            |            | (3-9)    | mmu-miR-106a    | caAAGUGCuaacagugcaggua   |
|                                                               |                       |            |            | (3-9)    | mmu-miR-20a     | uaAAGUGCuuauagugcagguag  |
|                                                               |                       |            |            | (2-8)    | mmu-miR-294-3p  | aAAGUGCuuccuuuugugugu    |
|                                                               |                       |            |            | (2-8)    | mmu-miR-295-3p  | aAAGUGCucacuacuuuugagucu |
|                                                               |                       |            |            | (2-8)    | mmu-miR-302     | uAAGUGCuucauguuuugguga   |
| GCACUUA                                                       | 0.9999281990          | 255        | 1.614      |          |                 |                          |
|                                                               |                       |            |            | (2-8)    | mmu-miR-467*    | gUAAGUCCcugcauguauaug    |
|                                                               |                       |            |            | (1-7)    | mmu-miR-302     | UAAGUGCuccauguuuugguga   |
| UGCACUU                                                       | 0.9988487421          | 415        | 1.402      |          |                 |                          |
|                                                               |                       |            |            | (2-8)    | mmu-miR-291b-3p | aAAGUGCAuccauuuuguuuguc  |
| AAGCACU                                                       | 0.9967070829          | 406        | 1.392      |          |                 |                          |



|  |         |                 |                          |
|--|---------|-----------------|--------------------------|
|  | (4-10)  | mmu-miR-17-5p   | caaAGUGCUUacagugcagguagu |
|  | (2-8)   | mmu-miR-302b    | aAGUGCUUccauguuuuaguag   |
|  | (3-9)   | mmu-miR-291a-3p | aaAGUGCUUccacuugugugcc   |
|  | (11-17) | mmu-miR-471     | uacguaguauAGUGCUUuucaca  |
|  | (2-8)   | mmu-miR-302d    | aAGUGCUUccauguuugagugu   |
|  | (3-9)   | mmu-miR-302c    | caAGUGCUUccauguuucagugg  |
|  | (4-10)  | mmu-miR-20a     | uaaAGUGCUUauagugcagguag  |
|  | (3-9)   | mmu-miR-294-3p  | aaAGUGCUUccuuuuugugugu   |
|  | (3-9)   | mmu-miR-302     | uaAGUGCUUccauguuuugguga  |

**Motifs enriched in transcripts downregulated in Dicer -/- cells transfected with miR-290 cluster**

| Motif   | Posterior probability | Occurrence | Enrichment | Position | miRNA           | Sequence of miRNA        |
|---------|-----------------------|------------|------------|----------|-----------------|--------------------------|
| UUUUUUU | 0.9999999542          | 2299       | 1.175      |          |                 |                          |
| GCACUUA | 0.9999976429          | 126        | 2.047      |          |                 |                          |
|         |                       |            |            | (2-8)    | mmu-miR-467*    | gUAAGUGCcugcauguauaug    |
|         |                       |            |            | (1-7)    | mmu-miR-302     | UAAGUGCuuccauguuuugguga  |
| UUUGUUU | 0.9999952321          | 931        | 1.265      |          |                 |                          |
|         |                       |            |            | (1-7)    | mmu-miR-495     | AAACAAcauggugcacuucuu    |
| UUUUGUU | 0.999912871           | 776        | 1.272      |          |                 |                          |
| AGCACUU | 0.999696131           | 224        | 1.576      |          |                 |                          |
|         |                       |            |            | (3-9)    | mmu-miR-17-5p   | caAAGUGCUuacagugcagguagu |
|         |                       |            |            | (1-7)    | mmu-miR-302b    | AAGUGCUuccauguuuuaguag   |
|         |                       |            |            | (2-8)    | mmu-miR-291a-3p | aAAGUGCUuccacuugugugcc   |
|         |                       |            |            | (3-9)    | mmu-miR-93      | caAAGUGCUguucgugcagguag  |
|         |                       |            |            | (3-9)    | mmu-miR-20b     | caAAGUGCUcauagugcaggua   |
|         |                       |            |            | (1-7)    | mmu-miR-302d    | AAGUGCUuccauguuugagugu   |
|         |                       |            |            | (2-8)    | mmu-miR-302c    | cAAGUGCUuccauguuucagugg  |
|         |                       |            |            | (3-9)    | mmu-miR-106b    | uaAAGUGCUgacagugcagau    |
|         |                       |            |            | (3-9)    | mmu-miR-106a    | caAAGUGCUaacagugcaggua   |
|         |                       |            |            | (3-9)    | mmu-miR-20a     | uaAAGUGCUuauagugcagguag  |
|         |                       |            |            | (2-8)    | mmu-miR-294-3p  | aAAGUGCUuccuuuuugugugu   |
|         |                       |            |            | (2-8)    | mmu-miR-295-3p  | aAAGUGCUacuacuuuugagucu  |
|         |                       |            |            | (2-8)    | mmu-miR-302     | uAAGUGCUuccauguuuugguga  |
| GCACUUU | 0.9996301511          | 193        | 1.635      |          |                 |                          |
|         |                       |            |            | (2-8)    | mmu-miR-17-5p   | cAAAGUGCuuacagugcagguagu |

|         |              |     |       |       |                 |                         |
|---------|--------------|-----|-------|-------|-----------------|-------------------------|
|         |              |     |       | (1-7) | mmu-miR-291a-3p | AAAGUGCuccacuuugugugcc  |
|         |              |     |       | (2-8) | mmu-miR-93      | cAAAGUGCuguucgugcagguag |
|         |              |     |       | (2-8) | mmu-miR-20b     | cAAAGUGCucauagugcaggua  |
|         |              |     |       | (1-7) | mmu-miR-291b-3p | AAAGUGCauccauuuuguuuguc |
|         |              |     |       | (2-8) | mmu-miR-106b    | uAAAGUGCugacagugcagau   |
|         |              |     |       | (2-8) | mmu-miR-106a    | cAAAGUGCuaacagugcaggua  |
|         |              |     |       | (2-8) | mmu-miR-20a     | uAAAGUGCuuauagugcagguag |
|         |              |     |       | (1-7) | mmu-miR-294-3p  | AAAGUGCuuccuuuugugugu   |
|         |              |     |       | (1-7) | mmu-miR-295-3p  | AAAGUGCuacuacuuuugagucu |
| UUGUUUU | 0.9989237718 | 802 | 1.245 |       |                 |                         |
| UAUUUUU | 0.9983591123 | 691 | 1.264 |       |                 |                         |

**Supplementary Table 2.** Profiling of miRNA levels in *Dicer*<sup>+/-</sup> and *Dicer*<sup>-/-</sup> ES cells using miRCURY™ Exqon microarrays.

Microarray analysis was performed as described in Supplementary Materials and Methods. 190 miRNAs gave significant hybridization signals with both analyzed *Dicer*<sup>+/-</sup> RNA samples and thus were considered for further analysis. The miRNA expression levels in *Dicer*<sup>-/-</sup> ES cells were compared to the expression levels in *Dicer*<sup>+/-</sup> ES cells. The numbers of miRNAs down- or up-regulated, or not changing, with cut-offs of 1.2-fold, 1.5-fold and 2.0-fold are shown in the table. The miRNAs that were down-regulated more than 1.5-fold or 2.0-fold were considered as expressed in ES cells in a *Dicer*-dependent manner. These miRNAs are listed and their expression levels normalized to the expression levels in a control reference sample (a mixture of total RNA from 11 different tissues) are indicated to identify miRNAs expressed preferentially in ES cells.

**Supplementary Table 2 - miRNA expression profiling in Dicer +/- and Dicer -/- ES cells**

| <b>Changes in miRNA levels in Dicer -/- cells</b> | <b>Number of miRNAs</b> | <b>% of all detected miRNAs (n=190)</b> |
|---------------------------------------------------|-------------------------|-----------------------------------------|
| <b>CUT-OFF 1.2-FOLD</b>                           |                         |                                         |
| downregulated 1.2-fold                            | 115                     | 60,3                                    |
| upregulated 1.2-fold                              | 23                      | 12,2                                    |
| not changed above 1.2-fold                        | 52                      | 27,5                                    |
| <b>CUT-OFF 1.5-FOLD</b>                           |                         |                                         |
| downregulated 1.5-fold                            | 69                      | 36,0                                    |
| upregulated 1.5-fold                              | 8                       | 4,2                                     |
| not changed above 1.5-fold                        | 113                     | 59,8                                    |
| <b>CUT-OFF 2.0-FOLD</b>                           |                         |                                         |
| downregulated 2.0-fold                            | 29                      | 14,8                                    |
| upregulated 2.0-fold                              | 3                       | 1,6                                     |
| not changed above 2.0-fold                        | 158                     | 83,6                                    |

| <b>miRNAs DOWNREGULATED &gt;2.0-fold</b>                                    |                                                                                 |                                                                      |
|-----------------------------------------------------------------------------|---------------------------------------------------------------------------------|----------------------------------------------------------------------|
| <b>Expressed &gt; 1.5-fold higher relative to control reference mixture</b> | <b>Expressed between 1.5- to 0.5-fold relative to control reference mixture</b> | <b>Expressed &lt; 0.5-fold relative to control reference mixture</b> |
| mmu-let-7d*                                                                 | mmu-miR-136                                                                     | mmu-miR-101a                                                         |
| mmu-miR-291a-3p                                                             | mmu-miR-18                                                                      | mmu-miR-103                                                          |
| mmu-miR-292-3p                                                              | mmu-miR-337                                                                     | mmu-miR-106a                                                         |
| mmu-miR-293 (miR-293-3p)                                                    | mmu-miR-376a                                                                    | mmu-miR-130a                                                         |
| mmu-mir294 (miR-294-3p)                                                     | mmu-miR-467*                                                                    | mmu-miR-140*                                                         |
| mmu-miR-295 (miR-295-3p)                                                    | mmu-miR-541                                                                     | mmu-miR-146b                                                         |
|                                                                             |                                                                                 | mmu-miR-16                                                           |
|                                                                             |                                                                                 | mmu-miR-17-5p                                                        |
|                                                                             |                                                                                 | mmu-miR-191                                                          |
|                                                                             |                                                                                 | mmu-miR-193                                                          |
|                                                                             |                                                                                 | mmu-miR-200a                                                         |
|                                                                             |                                                                                 | mmu-miR-20b                                                          |
|                                                                             |                                                                                 | mmu-miR-21                                                           |
|                                                                             |                                                                                 | mmu-miR-22                                                           |
|                                                                             |                                                                                 | mmu-miR-23a                                                          |

|  |  |             |
|--|--|-------------|
|  |  | mmu-miR-335 |
|  |  | mmu-miR-98  |

| <b>miRNAs DOWNREGULATED &gt;1.5-fold</b>                                    |                                                                                 |                                                                      |
|-----------------------------------------------------------------------------|---------------------------------------------------------------------------------|----------------------------------------------------------------------|
| <b>Expressed &gt; 1.5-fold higher relative to control reference mixture</b> | <b>Expressed between 1.5- to 0.5-fold relative to control reference mixture</b> | <b>Expressed &lt; 0.5-fold relative to control reference mixture</b> |
| mmu-let-7d*                                                                 | mmu-miR-136                                                                     | mmu-let-7i                                                           |
| mmu-miR-291a-3p                                                             | mmu-miR-18                                                                      | mmu-miR-101a                                                         |
| mmu-miR-292-3p                                                              | mmu-miR-337                                                                     | mmu-miR-101b                                                         |
| mmu-miR-293 (miR-293-3p)                                                    | mmu-miR-341                                                                     | mmu-miR-103                                                          |
| mmu-mir294 (miR-294-3p)                                                     | mmu-miR-376a                                                                    | mmu-miR-106a                                                         |
| mmu-miR-295 (miR-295-3p)                                                    | mmu-miR-379                                                                     | mmu-miR-107                                                          |
| mmu-miR-697                                                                 | mmu-miR-467*                                                                    | mmu-miR-10b                                                          |
|                                                                             | mmu-miR-541                                                                     | mmu-miR-122a                                                         |
|                                                                             |                                                                                 | mmu-miR-127                                                          |
|                                                                             |                                                                                 | mmu-miR-128a                                                         |
|                                                                             |                                                                                 | mmu-miR-130a                                                         |
|                                                                             |                                                                                 | mmu-miR-133a*                                                        |
|                                                                             |                                                                                 | mmu-miR-140                                                          |
|                                                                             |                                                                                 | mmu-miR-140*                                                         |
|                                                                             |                                                                                 | mmu-miR-142-5p                                                       |
|                                                                             |                                                                                 | mmu-miR-143                                                          |
|                                                                             |                                                                                 | mmu-miR-146                                                          |
|                                                                             |                                                                                 | mmu-miR-146b                                                         |
|                                                                             |                                                                                 | mmu-miR-148a                                                         |
|                                                                             |                                                                                 | mmu-miR-148b                                                         |
|                                                                             |                                                                                 | mmu-miR-15a                                                          |
|                                                                             |                                                                                 | mmu-miR-15b                                                          |
|                                                                             |                                                                                 | mmu-miR-16                                                           |
|                                                                             |                                                                                 | mmu-miR-17-5p                                                        |
|                                                                             |                                                                                 | mmu-miR-191                                                          |
|                                                                             |                                                                                 | mmu-miR-193                                                          |
|                                                                             |                                                                                 | mmu-miR-195                                                          |
|                                                                             |                                                                                 | mmu-miR-19b                                                          |
|                                                                             |                                                                                 | mmu-miR-200a                                                         |

|  |                |
|--|----------------|
|  | mmu-miR-200b   |
|  | mmu-miR-20b    |
|  | mmu-miR-21     |
|  | mmu-miR-22     |
|  | mmu-miR-222    |
|  | mmu-miR-223    |
|  | mmu-miR-23a    |
|  | mmu-miR-23b    |
|  | mmu-miR-24     |
|  | mmu-miR-26a    |
|  | mmu-miR-27a    |
|  | mmu-miR-27b    |
|  | mmu-miR-29a    |
|  | mmu-miR-29c    |
|  | mmu-miR-30a-5p |
|  | mmu-miR-30b    |
|  | mmu-miR-30c    |
|  | mmu-miR-30e    |
|  | mmu-miR-335    |
|  | mmu-miR-338    |
|  | mmu-miR-376b   |
|  | mmu-miR-449    |
|  | mmu-miR-451    |
|  | mmu-miR-9*     |
|  | mmu-miR-98     |

**Supplementary Table 3 - Predicted primary targets of the miR-290 cluster miRNAs**

| RefSeq       | Gene symbol   | Description                                                                              | Number of GCACUU motifs |
|--------------|---------------|------------------------------------------------------------------------------------------|-------------------------|
| NM_025326    | 0610011I04Rik | Mus musculus RIKEN cDNA 0610011I04 gene                                                  | 1                       |
| XM_001003634 | 1110060D06Rik | PREDICTED: Mus musculus RIKEN cDNA 1110060D06 gene, transcript variant 2                 | 1                       |
| XM_978179    | 1810013L24Rik | PREDICTED: Mus musculus RIKEN cDNA 1810013L24 gene, transcript variant 1                 | 2                       |
| NM_026437    | 1810055E12Rik | Mus musculus RIKEN cDNA 1810055E12 gene                                                  | 2                       |
| NM_175381    | 2700081O15Rik | Mus musculus RIKEN cDNA 2700081O15 gene                                                  | 4                       |
| NM_172877    | 4732496O08Rik | Mus musculus RIKEN cDNA 4732496O08 gene                                                  | 1                       |
| NM_029037    | 4930444A02Rik | Mus musculus RIKEN cDNA 4930444A02 gene                                                  | 2                       |
| NM_175172    | 4930506M07Rik | Mus musculus RIKEN cDNA 4930506M07 gene                                                  | 1                       |
| NM_173764    | 4932414K18Rik | Mus musculus RIKEN cDNA 4932414K18 gene                                                  | 2                       |
| NM_175263    | 5730593N15Rik | Mus musculus RIKEN cDNA 5730593N15 gene                                                  | 1                       |
| NM_146091    | 5730596K20Rik | Mus musculus RIKEN cDNA 5730596K20 gene                                                  | 1                       |
| NM_025697    | 6330409N04Rik | Mus musculus RIKEN cDNA 6330409N04 gene                                                  | 1                       |
| XM_991839    | 9030420J04Rik | PREDICTED: Mus musculus RIKEN cDNA 9030420J04 gene                                       | 1                       |
| NM_153117    | 9530068E07Rik | Mus musculus RIKEN cDNA 9530068E07 gene                                                  | 4                       |
| NM_001007577 | A630018P17Rik | Mus musculus RIKEN cDNA A630018P17 gene                                                  | 1                       |
| NM_177118    | A830073O21Rik | Mus musculus RIKEN cDNA A830073O21 gene                                                  | 2                       |
| NM_015729    | Acox1         | Mus musculus acyl-Coenzyme A oxidase 1, palmitoyl                                        | 1                       |
| NM_007394    | Acvr1         | Mus musculus activin A receptor, type 1                                                  | 1                       |
| NM_007404    | Adam9         | Mus musculus a disintegrin and metallopeptidase domain 9 (meltrin gamma)                 | 2                       |
| NM_007408    | Adfp          | Mus musculus adipose differentiation related protein                                     | 1                       |
| NM_001005605 | Aebp2         | Mus musculus AE binding protein 2                                                        | 2                       |
| NM_001033476 | AI450948      | Mus musculus expressed sequence AI450948                                                 | 1                       |
| NM_177907    | AI593442      | Mus musculus expressed sequence AI593442                                                 | 1                       |
| NM_145489    | AI661453      | Mus musculus expressed sequence AI661453                                                 | 1                       |
| NM_011785    | Akt3          | Mus musculus thymoma viral proto-oncogene 3                                              | 1                       |
| NM_028270    | Aldh1b1       | Mus musculus aldehyde dehydrogenase 1 family, member B1                                  | 1                       |
| NM_019998    | Alg2          | Mus musculus asparagine-linked glycosylation 2 homolog (yeast, alpha-1,3-mannosyltransfe | 1                       |
| NM_009667    | Ampd3         | Mus musculus AMP deaminase 3                                                             | 1                       |
| NM_134071    | Ankrd32       | Mus musculus ankyrin repeat domain 32                                                    | 1                       |
| XM_001000870 | Ap1g1         | PREDICTED: Mus musculus adaptor protein complex AP-1, gamma 1 subunit                    | 1                       |
| NM_007457    | Ap1s1         | Mus musculus adaptor protein complex AP-1, sigma 1                                       | 1                       |
| NM_009686    | Apbb2         | Mus musculus amyloid beta (A4) precursor protein-binding, family B, member 2             | 1                       |

|              |               |                                                                                       |   |
|--------------|---------------|---------------------------------------------------------------------------------------|---|
| NM_027144    | Arhgef12      | Mus musculus Rho guanine nucleotide exchange factor (GEF) 12                          | 2 |
| NM_001039515 | Arl4a         | Mus musculus ADP-ribosylation factor-like 4A                                          | 1 |
| NM_007488    | Arnt2         | Mus musculus aryl hydrocarbon receptor nuclear translocator 2                         | 1 |
| NM_030711    | Arts1         | Mus musculus type 1 tumor necrosis factor receptor shedding aminopeptidase regulator  | 1 |
| NM_025541    | Asf1a         | Mus musculus ASF1 anti-silencing function 1 homolog A (S. cerevisiae)                 | 2 |
| NM_138679    | Ash1l         | Mus musculus ash1 (absent, small, or homeotic)-like (Drosophila)                      | 3 |
| NM_007496    | Atbf1         | Mus musculus AT motif binding factor 1                                                | 2 |
| NM_177632    | BC022623      | Mus musculus cDNA sequence BC022623                                                   | 1 |
| NM_153407    | BC035295      | Mus musculus cDNA sequence BC035295                                                   | 1 |
| XM_984947    | BC053401      | PREDICTED: Mus musculus cDNA sequence BC053401, transcript variant 2                  | 1 |
| NM_012060    | Bcap31        | Mus musculus B-cell receptor-associated protein 31                                    | 1 |
| NM_080708    | Bmp2k         | Mus musculus BMP2 inducible kinase                                                    | 1 |
| NM_027430    | Brp44         | Mus musculus brain protein 44                                                         | 1 |
| NM_009790    | Calm1         | Mus musculus calmodulin 1                                                             | 1 |
| NM_177343    | Camk1d        | Mus musculus calcium/calmodulin-dependent protein kinase ID                           | 4 |
| XM_001000085 | Camta1        | PREDICTED: Mus musculus calmodulin binding transcription activator 1                  | 1 |
| XM_985577    | Cand1         | PREDICTED: Mus musculus cullin associated and neddylation disassociated 1             | 2 |
| NM_007610    | Casp2         | Mus musculus caspase 2                                                                | 4 |
| NM_009817    | Cast          | Mus musculus calpastatin                                                              | 1 |
| NM_028763    | Cbx6          | Mus musculus chromobox homolog 6                                                      | 1 |
| NM_198164    | Cdc2l6        | Mus musculus cell division cycle 2-like 6 (CDK8-like)                                 | 2 |
| NM_007669    | Cdkn1a        | Mus musculus cyclin-dependent kinase inhibitor 1A (P21)                               | 3 |
| NM_028760    | Cep55         | Mus musculus centrosomal protein 55                                                   | 2 |
| NM_019950    | Chst5         | Mus musculus carbohydrate (N-acetylglucosamine 6-O) sulfotransferase 5                | 1 |
| NM_013885    | Clic4         | Mus musculus chloride intracellular channel 4 (mitochondrial)                         | 2 |
| XM_921620    | Cnot6         | PREDICTED: Mus musculus CCR4-NOT transcription complex, subunit 6, transcript variant | 4 |
| NM_178854    | Cnot6l        | Mus musculus CCR4-NOT transcription complex, subunit 6-like                           | 2 |
| NM_013495    | Cpt1a         | Mus musculus carnitine palmitoyltransferase 1a, liver                                 | 1 |
| NM_009963    | Cry2          | Mus musculus cryptochrome 2 (photolyase-like)                                         | 2 |
| NM_026444    | Cs            | Mus musculus citrate synthase                                                         | 1 |
| NM_173185    | Csnk1g1       | Mus musculus casein kinase 1, gamma 1                                                 | 4 |
| NM_177662    | Ctso          | Mus musculus cathepsin O                                                              | 2 |
| NM_177640    | D030056L22Rik | Mus musculus RIKEN cDNA D030056L22 gene                                               | 2 |
| XM_984040    | D630040G17Rik | PREDICTED: Mus musculus RIKEN cDNA D630040G17 gene                                    | 3 |
| NM_011873    | Dazap2        | Mus musculus DAZ associated protein 2                                                 | 3 |
| NM_026302    | Dctn4         | Mus musculus dynactin 4                                                               | 4 |



|              |               |                                                                                          |   |
|--------------|---------------|------------------------------------------------------------------------------------------|---|
| XM_001005781 | Ddef2         | PREDICTED: Mus musculus development and differentiation enhancing factor 2               | 1 |
| NM_001039106 | Ddhd1         | Mus musculus DDHD domain containing 1                                                    | 3 |
| NM_007916    | Ddx19a        | Mus musculus DEAD (Asp-Glu-Ala-Asp) box polypeptide 19a                                  | 1 |
| XM_898691    | Dip2a         | PREDICTED: Mus musculus DIP2 disco-interacting protein 2 homolog A (Drosophila), transcr | 1 |
| XM_619261    | Dock5         | PREDICTED: Mus musculus dedicator of cytokinesis 5, transcript variant 1                 | 1 |
| NM_053090    | Drctnnb1a     | Mus musculus down-regulated by Ctnnb1, a                                                 | 1 |
| NM_001013371 | Dtx3l         | Mus musculus deltex 3-like (Drosophila)                                                  | 3 |
| NM_001013380 | Dync1li2      | Mus musculus dynein, cytoplasmic 1 light intermediate chain 2                            | 2 |
| NM_173386    | E330016A19Rik | Mus musculus RIKEN cDNA E330016A19 gene                                                  | 3 |
| NM_001001932 | Eea1          | Mus musculus early endosome antigen 1                                                    | 1 |
| NM_007915    | Ei24          | Mus musculus etoposide induced 2.4 mRNA                                                  | 1 |
| NM_207685    | Elavl2        | Mus musculus ELAV (embryonic lethal, abnormal vision, Drosophila)-like 2 (Hu antigen B)  | 2 |
| NM_007936    | Epha4         | Mus musculus Eph receptor A4                                                             | 2 |
| NM_007961    | Etv6          | Mus musculus ets variant gene 6 (TEL oncogene)                                           | 2 |
| NM_153118    | Fnbp1l        | Mus musculus formin binding protein 1-like                                               | 1 |
| NM_173182    | Fndc3b        | Mus musculus fibronectin type III domain containing 3B                                   | 1 |
| NM_028194    | Fryl          | Mus musculus furry homolog-like (Drosophila)                                             | 1 |
| XM_980423    | Furin         | PREDICTED: Mus musculus furin (paired basic amino acid cleaving enzyme), transcript vari | 1 |
| NM_008056    | Fzd6          | Mus musculus frizzled homolog 6 (Drosophila)                                             | 1 |
| NM_019749    | Gabarap       | Mus musculus gamma-aminobutyric acid receptor associated protein                         | 1 |
| NM_013814    | Galnt1        | Mus musculus UDP-N-acetyl-alpha-D-galactosamine:polypeptide N-acetylgalactosaminyltrar   | 1 |
| NM_013529    | Gfpt2         | Mus musculus glutamine fructose-6-phosphate transaminase 2                               | 1 |
| NM_133236    | Glcci1        | Mus musculus glucocorticoid induced transcript 1                                         | 1 |
| NM_025374    | Glo1          | Mus musculus glyoxalase 1                                                                | 1 |
| NM_021610    | Gpa33         | Mus musculus glycoprotein A33 (transmembrane)                                            | 1 |
| NM_173747    | Gpkow         | Mus musculus G patch domain and KOW motifs                                               | 3 |
| NM_019986    | Habp4         | Mus musculus hyaluronic acid binding protein 4                                           | 2 |
| NM_026812    | Hddc3         | Mus musculus HD domain containing 3                                                      | 1 |
| NM_010437    | Hivep2        | Mus musculus human immunodeficiency virus type I enhancer binding protein 2              | 2 |
| NM_008253    | Hmgb3         | Mus musculus high mobility group box 3                                                   | 1 |
| NM_008258    | Hn1           | Mus musculus hematological and neurological expressed sequence 1                         | 2 |
| NM_010470    | Hp1bp3        | Mus musculus heterochromatin protein 1, binding protein 3                                | 2 |
| XM_985333    | Hs6st1        | PREDICTED: Mus musculus heparan sulfate 6-O-sulfotransferase 1                           | 2 |
| NM_175185    | Hsd1l         | Mus musculus hydroxysteroid dehydrogenase like 1                                         | 2 |
| NM_008331    | Ifit1         | Mus musculus interferon-induced protein with tetratricopeptide repeats 1                 | 1 |
| NM_019440    | Iigp2         | Mus musculus interferon inducible GTPase 2                                               | 1 |

|              |         |                                                                                         |   |
|--------------|---------|-----------------------------------------------------------------------------------------|---|
| NM_008371    | Il7     | Mus musculus interleukin 7                                                              | 2 |
| NM_172161    | Irak2   | Mus musculus interleukin-1 receptor-associated kinase 2                                 | 1 |
| NM_008390    | Irf1    | Mus musculus interferon regulatory factor 1                                             | 1 |
| XM_001002526 | Irf2bp2 | PREDICTED: Mus musculus interferon regulatory factor 2 binding protein 2                | 3 |
| NM_008394    | Isgf3g  | Mus musculus interferon dependent positive acting transcription factor 3 gamma          | 2 |
| NM_008402    | Itgav   | Mus musculus integrin alpha V                                                           | 1 |
| NM_010580    | Itgb5   | Mus musculus integrin beta 5                                                            | 1 |
| NM_008410    | Itm2b   | Mus musculus integral membrane protein 2B                                               | 1 |
| NM_021310    | Jmy     | Mus musculus junction-mediating and regulatory protein                                  | 1 |
| XM_978811    | Kctd1   | PREDICTED: Mus musculus potassium channel tetramerisation domain containing 1, transc   | 1 |
| NM_207682    | Kif1b   | Mus musculus kinesin family member 1B                                                   | 2 |
| XM_994052    | Klf3    | PREDICTED: Mus musculus Kruppel-like factor 3 (basic)                                   | 2 |
| NM_021284    | Kras    | Mus musculus v-Ki-ras2 Kirsten rat sarcoma viral oncogene homolog                       | 1 |
| NM_145743    | Lace1   | Mus musculus lactation elevated 1                                                       | 2 |
| NM_010685    | Lamp2   | Mus musculus lysosomal membrane glycoprotein 2                                          | 3 |
| NM_172153    | Lcorl   | Mus musculus ligand dependent nuclear receptor corepressor-like                         | 2 |
| NM_010094    | Lefty1  | Mus musculus left right determination factor 1                                          | 1 |
| NM_177099    | Lefty2  | Mus musculus Left-right determination factor 2                                          | 1 |
| NM_001029878 | Lonrf2  | Mus musculus LON peptidase N-terminal domain and ring finger 2                          | 2 |
| NM_172950    | Lpin1   | Mus musculus lipin 1                                                                    | 1 |
| NM_080420    | Lpo     | Mus musculus lactoperoxidase                                                            | 1 |
| NM_172784    | Lrp11   | Mus musculus low density lipoprotein receptor-related protein 11                        | 1 |
| NM_173038    | Lrrc35  | Mus musculus leucine rich repeat containing 35                                          | 3 |
| XM_984916    | Lycat   | PREDICTED: Mus musculus lysocardiolipin acyltransferase, transcript variant 3           | 1 |
| NM_172865    | Manea   | Mus musculus mannosidase, endo-alpha                                                    | 1 |
| NM_027920    | March8  | Mus musculus membrane-associated ring finger (C3HC4) 8                                  | 3 |
| NM_010773    | Mbd2    | Mus musculus methyl-CpG binding domain protein 2                                        | 1 |
| NM_020007    | Mbnl1   | Mus musculus muscleblind-like 1 (Drosophila)                                            | 2 |
| NM_175341    | Mbnl2   | Mus musculus muscleblind-like 2                                                         | 1 |
| NM_175088    | Mdfic   | Mus musculus MyoD family inhibitor domain containing                                    | 1 |
| XM_976104    | Mef2a   | PREDICTED: Mus musculus myocyte enhancer factor 2A, transcript variant 3                | 2 |
| XM_001002380 | Mfn2    | PREDICTED: Mus musculus mitofusin 2, transcript variant 4                               | 1 |
| XM_912670    | Mgat5   | PREDICTED: Mus musculus mannoside acetylglucosaminyltransferase 5, transcript variant 2 | 3 |
| NM_008606    | Mmp11   | Mus musculus matrix metalloproteinase 11                                                | 1 |
| NM_011985    | Mmp23   | Mus musculus matrix metalloproteinase 23                                                | 1 |
| NM_008636    | Mtf1    | Mus musculus metal response element binding transcription factor 1                      | 2 |

|              |          |                                                                                           |   |
|--------------|----------|-------------------------------------------------------------------------------------------|---|
| NM_001005864 | Mtus1    | Mus musculus mitochondrial tumor suppressor 1                                             | 1 |
| NM_139063    | Muted    | Mus musculus muted                                                                        | 2 |
| NM_008659    | Myo1c    | Mus musculus myosin IC                                                                    | 1 |
| NM_019542    | Nagk     | Mus musculus N-acetylglucosamine kinase                                                   | 1 |
| XM_973478    | Nck2     | PREDICTED: Mus musculus non-catalytic region of tyrosine kinase adaptor protein 2, transc | 1 |
| NM_172495    | Ncoa7    | Mus musculus nuclear receptor coactivator 7                                               | 1 |
| NM_008684    | Neo1     | Mus musculus neogenin                                                                     | 2 |
| NM_008687    | Nfib     | Mus musculus nuclear factor I/B                                                           | 1 |
| NM_023526    | Nkiras1  | Mus musculus NFKB inhibitor interacting Ras-like protein 1                                | 2 |
| NM_009697    | Nr2f2    | Mus musculus nuclear receptor subfamily 2, group F, member 2                              | 2 |
| NM_172416    | Ostm1    | Mus musculus osteopetrosis associated transmembrane protein 1                             | 1 |
| NM_008775    | Pafah1b2 | Mus musculus platelet-activating factor acetylhydrolase, isoform 1b, alpha2 subunit       | 1 |
| NM_011864    | Papss2   | Mus musculus 3'-phosphoadenosine 5'-phosphosulfate synthase 2                             | 1 |
| NM_028829    | Paqr8    | Mus musculus progesterin and adipoQ receptor family member VIII                           | 1 |
| XM_992943    | Pbx3     | PREDICTED: Mus musculus pre B-cell leukemia transcription factor 3, transcript variant 6  | 1 |
| XM_982935    | Pcgf4    | PREDICTED: Mus musculus polycomb group ring finger 4, transcript variant 4                | 1 |
| NM_008786    | Pcmt1    | Mus musculus protein-L-isoaspartate (D-aspartate) O-methyltransferase 1                   | 1 |
| XM_912421    | Pde3b    | PREDICTED: Mus musculus phosphodiesterase 3B, cGMP-inhibited                              | 1 |
| XM_920266    | Pdzd2    | PREDICTED: Mus musculus PDZ domain containing 2, transcript variant 9                     | 1 |
| NM_019410    | Pfn2     | Mus musculus profilin 2                                                                   | 4 |
| NM_171824    | Pgbd5    | Mus musculus piggyBac transposable element derived 5                                      | 2 |
| XM_895539    | Phip     | PREDICTED: Mus musculus pleckstrin homology domain interacting protein, transcript varia  | 3 |
| NM_201406    | Pigs     | Mus musculus phosphatidylinositol glycan anchor biosynthesis, class S                     | 1 |
| NM_181585    | Pik3r3   | Mus musculus phosphatidylinositol 3 kinase, regulatory subunit, polypeptide 3 (p55)       | 1 |
| NM_001025309 | Pja2     | Mus musculus praja 2, RING-H2 motif containing                                            | 1 |
| NM_018807    | Plagl2   | Mus musculus pleiomorphic adenoma gene-like 2                                             | 3 |
| NM_031256    | Plekha3  | Mus musculus pleckstrin homology domain-containing, family A (phosphoinositide binding sp | 1 |
| NM_183034    | Plekha1  | Mus musculus pleckstrin homology domain containing, family M (with RUN domain) member     | 2 |
| NM_023564    | Plscr3   | Mus musculus phospholipid scramblase 3                                                    | 1 |
| NM_010127    | Pou6f1   | Mus musculus POU domain, class 6, transcription factor 1                                  | 2 |
| NM_024209    | Ppp6c    | Mus musculus protein phosphatase 6, catalytic subunit                                     | 1 |
| NM_178738    | Prss35   | Mus musculus protease, serine, 35                                                         | 2 |
| NM_008971    | Ptk9     | Mus musculus protein tyrosine kinase 9                                                    | 1 |
| NM_011877    | Ptpn21   | Mus musculus protein tyrosine phosphatase, non-receptor type 21                           | 2 |
| NM_027514    | Pvr      | Mus musculus poliovirus receptor                                                          | 2 |
| NM_024436    | Rab22a   | Mus musculus RAB22A, member RAS oncogene family                                           | 3 |

|              |           |                                                                                            |   |
|--------------|-----------|--------------------------------------------------------------------------------------------|---|
| NM_026405    | Rab32     | Mus musculus RAB32, member RAS oncogene family                                             | 1 |
| NM_144875    | Rab711    | Mus musculus RAB7, member RAS oncogene family-like 1                                       | 1 |
| NM_001038621 | Rabgap1l  | Mus musculus RAB GTPase activating protein 1-like                                          | 1 |
| XM_983626    | Rapgef2   | PREDICTED: Mus musculus Rap guanine nucleotide exchange factor (GEF) 2                     | 1 |
| NM_009826    | Rb1cc1    | Mus musculus RB1-inducible coiled-coil 1                                                   | 2 |
| NM_011250    | Rbl2      | Mus musculus retinoblastoma-like 2                                                         | 3 |
| NM_029777    | Rhbdd1    | Mus musculus rhomboid domain containing 1                                                  | 1 |
| NM_007484    | Rhoc      | Mus musculus ras homolog gene family, member C                                             | 1 |
| NM_145491    | Rhoq      | Mus musculus ras homolog gene family, member Q                                             | 1 |
| NM_023894    | Rhox9     | Mus musculus reproductive homeobox 9                                                       | 1 |
| NM_009068    | Ripk1     | Mus musculus receptor (TNFRSF)-interacting serine-threonine kinase 1                       | 1 |
| NM_023270    | Rnf128    | Mus musculus ring finger protein 128                                                       | 1 |
| NM_011277    | Rnf2      | Mus musculus ring finger protein 2                                                         | 1 |
| XM_903197    | Rora      | PREDICTED: Mus musculus RAR-related orphan receptor alpha, transcript variant 4            | 4 |
| NM_009075    | Rpia      | Mus musculus ribose 5-phosphate isomerase A                                                | 1 |
| NM_199476    | Rrm2b     | Mus musculus ribonucleotide reductase M2 B (TP53 inducible)                                | 1 |
| NM_030179    | Rsnl2     | Mus musculus restin-like 2                                                                 | 1 |
| NM_030692    | Sacm1l    | Mus musculus SAC1 (suppressor of actin mutations 1, homolog)-like ( <i>S. cerevisiae</i> ) | 1 |
| NM_011452    | Serpinb9b | Mus musculus serine (or cysteine) peptidase inhibitor, clade B, member 9b                  | 2 |
| NM_031179    | Sf3b1     | Mus musculus splicing factor 3b, subunit 1                                                 | 2 |
| XM_988661    | Sh3glb1   | PREDICTED: Mus musculus SH3-domain GRB2-like B1 (endophilin)                               | 1 |
| NM_177364    | Sh3pxd2b  | Mus musculus SH3 and PX domains 2B                                                         | 3 |
| NM_172966    | Sh3rf2    | Mus musculus SH3 domain containing ring finger 2                                           | 1 |
| NM_134038    | Slc16a6   | Mus musculus solute carrier family 16 (monocarboxylic acid transporters), member 6         | 1 |
| NM_025807    | Slc16a9   | Mus musculus solute carrier family 16 (monocarboxylic acid transporters), member 9         | 1 |
| NM_172773    | Slc17a5   | Mus musculus solute carrier family 17 (anion/sugar transporter), member 5                  | 2 |
| NM_018861    | Slc1a4    | Mus musculus solute carrier family 1 (glutamate/neutral amino acid transporter), member 4  | 1 |
| NM_021435    | Slc35b4   | Mus musculus solute carrier family 35, member B4                                           | 2 |
| NM_133741    | Snrk      | Mus musculus SNF related kinase                                                            | 1 |
| NM_029068    | Snx16     | Mus musculus sorting nexin 16                                                              | 1 |
| NM_028937    | Sohlh2    | Mus musculus spermatogenesis and oogenesis specific basic helix-loop-helix 2               | 1 |
| NM_009274    | Srpk2     | Mus musculus serine/arginine-rich protein specific kinase 2                                | 3 |
| NM_138744    | Ssx2ip    | Mus musculus synovial sarcoma, X breakpoint 2 interacting protein                          | 1 |
| NM_011374    | St8sia1   | Mus musculus ST8 alpha-N-acetyl-neuraminide alpha-2,8-sialyltransferase 1                  | 1 |
| NM_024239    | Stampb    | Mus musculus Stam binding protein                                                          | 1 |
| NM_133810    | Stk17b    | Mus musculus serine/threonine kinase 17b (apoptosis-inducing)                              | 2 |

|           |          |                                                                                       |   |
|-----------|----------|---------------------------------------------------------------------------------------|---|
| NM_134115 | Stk38    | Mus musculus serine/threonine kinase 38                                               | 1 |
| NM_026343 | Stx17    | Mus musculus syntaxin 17                                                              | 1 |
| NM_025932 | Syap1    | Mus musculus synapse associated protein 1                                             | 2 |
| XM_903544 | Syde1    | PREDICTED: Mus musculus synapse defective 1, Rho GTPase, homolog 1 (C. elegans)       | 1 |
| XM_981719 | Synj1    | PREDICTED: Mus musculus synaptojanin 1                                                | 1 |
| NM_145968 | Tagap    | Mus musculus T-cell activation Rho GTPase-activating protein                          | 1 |
| NM_198294 | Tanc1    | Mus musculus tetratricopeptide repeat, ankyrin repeat and coiled-coil containing 1    | 2 |
| NM_023755 | Tcfcp2l1 | Mus musculus transcription factor CP2-like 1                                          | 2 |
| NM_146142 | Tdrd7    | Mus musculus tudor domain containing 7                                                | 1 |
| NM_009371 | Tgfbr2   | Mus musculus transforming growth factor, beta receptor II                             | 3 |
| NM_009373 | Tgm2     | Mus musculus transglutaminase 2, C polypeptide                                        | 1 |
| NM_133352 | Tm9sf3   | Mus musculus transmembrane 9 superfamily member 3                                     | 1 |
| XM_892747 | Tmcc1    | PREDICTED: Mus musculus transmembrane and coiled coil domains 1, transcript variant 2 | 2 |
| NM_134020 | Tmed4    | Mus musculus transmembrane emp24 protein transport domain containing 4                | 1 |
| NM_144792 | Tmem23   | Mus musculus transmembrane protein 23                                                 | 1 |
| NM_009395 | Tnfaip1  | Mus musculus tumor necrosis factor, alpha-induced protein 1 (endothelial)             | 2 |
| XM_982893 | Tnrc6a   | PREDICTED: Mus musculus trinucleotide repeat containing 6a                            | 1 |
| NM_009277 | Trim21   | Mus musculus tripartite motif protein 21                                              | 2 |
| NM_178872 | Trim36   | Mus musculus tripartite motif-containing 36                                           | 1 |
| XM_987804 | Trps1    | PREDICTED: Mus musculus trichorhinophalangeal syndrome I (human)                      | 1 |
| NM_133681 | Tspan1   | Mus musculus tetraspanin 1                                                            | 2 |
| NM_026954 | Tusc1    | Mus musculus tumor suppressor candidate 1                                             | 1 |
| NM_028339 | Txndc1   | Mus musculus thioredoxin domain containing 1                                          | 2 |
| NM_153162 | Txnrd3   | Mus musculus thioredoxin reductase 3                                                  | 1 |
| NM_019586 | Ube2j1   | Mus musculus ubiquitin-conjugating enzyme E2, J1                                      | 1 |
| NM_172300 | Ube2z    | Mus musculus ubiquitin-conjugating enzyme E2Z (putative)                              | 1 |
| NM_011670 | Uchl1    | Mus musculus ubiquitin carboxy-terminal hydrolase L1                                  | 2 |
| NM_009466 | Ugdh     | Mus musculus UDP-glucose dehydrogenase                                                | 1 |
| NM_177561 | Usp46    | Mus musculus ubiquitin specific peptidase 46                                          | 2 |
| XM_977760 | Wdr26    | PREDICTED: Mus musculus WD repeat domain 26, transcript variant 7                     | 1 |
| NM_011701 | Vim      | Mus musculus vimentin                                                                 | 1 |
| NM_172643 | Zbtb41   | Mus musculus zinc finger and BTB domain containing 41 homolog                         | 4 |
| NM_010731 | Zbtb7a   | Mus musculus zinc finger and BTB domain containing 7a                                 | 4 |
| NM_028864 | Zc3hav1  | Mus musculus zinc finger CCCH type, antiviral 1                                       | 1 |
| NM_011749 | Zfp148   | Mus musculus zinc finger protein 148                                                  | 2 |
| NM_175494 | Zfp367   | Mus musculus zinc finger protein 367                                                  | 4 |

|           |         |                                                                      |   |
|-----------|---------|----------------------------------------------------------------------|---|
| NM_009557 | Zfp46   | Mus musculus zinc finger protein 46                                  | 2 |
| NM_133218 | Zfp704  | Mus musculus zinc finger protein 704                                 | 5 |
| NM_133906 | Zkscan1 | Mus musculus zinc finger with KRAB and SCAN domains 1                | 5 |
| NM_144516 | Zmynd11 | Mus musculus zinc finger, MYND domain containing 11                  | 1 |
| XM_893176 | Znrf3   | PREDICTED: Mus musculus zinc and ring finger 3, transcript variant 2 | 2 |

**Supplementary Table 4. Primers used in the study.**

| Primer pair                                      |         | Primer sequences (5'-3')         | Reference |
|--------------------------------------------------|---------|----------------------------------|-----------|
| <b>Primers for chromatin immunoprecipitation</b> |         |                                  |           |
| GAPDH                                            | forward | TCCCTCCCCCTATCAGTTC              |           |
|                                                  | reverse | TTGGACCCGCCTCATTTTT              |           |
| Oct-4                                            | forward | TGGGCTGAAATACTGGGTTTC            |           |
|                                                  | reverse | TTGAATGTTTCGTGTGCCAAT            |           |
| <b>Primers for real-time quantitative RT-PCR</b> |         |                                  |           |
| GAPDH                                            | forward | CCATCACCATCTTCCAGG               |           |
|                                                  | reverse | CCTGCTTCACCACCTTCTTG             |           |
| Oct-4                                            | forward | GGCGTTCGCTTTGGAAAGGTGTTCC        |           |
|                                                  | reverse | CTCGAACCCACATCCTTCTCT            |           |
| Nanog                                            | forward | TGATTCAGAAGGGCTCAGCAC            |           |
|                                                  | reverse | GGGATAGCTGCAATGGATGC             |           |
| GCNF                                             | forward | TGAATTGGCAGAGCTTGATCC            |           |
|                                                  | reverse | CGATCATCTGGGACGGAAAC             |           |
| Dnmt3a2                                          | forward | AGGGGCTGCACCTGGCCTT              | 1         |
|                                                  | reverse | TCCCCACACCAGCTCTCC               | 1         |
| Dnmt3b1/b6                                       | forward | TGGGATCGAGGGCCTCAAAC             | 1         |
|                                                  | reverse | TTCCACAGGACAAACAGCGG             | 1         |
| Rbl2                                             | forward | CCCGGAGCCAGGTGTACA               |           |
|                                                  | reverse | CCTCATCACTGGGCTGGAAT             |           |
| <b>Primers for bisulfite sequencing</b>          |         |                                  |           |
| Oct-3/4 [-2069]                                  | forward | GGGAGGAATTGGGTGTGGGGAGGTT        | 2         |
| Oct-3/4 [-1677]                                  | reverse | AAAAATCCCCTCCTTCTACCACAT         | 2         |
| Oct-3/4 [-1505]                                  | forward | TGATGAAGATTATTATTAAGAGAT         | 2         |
| Oct-3/4 [-992]                                   | reverse | CCCCAATCCCCTCACACAAAACCTT        | 2         |
| Oct-3/4 [-212]                                   | forward | AGGATTTTGAAGGTTGAAAATGAAGG       | 2         |
| Oct-3/4 [-8]                                     | reverse | TCCCTCCCCAATCCCACCCTC            | 2         |
| Oct-3/4 [+1173]                                  | forward | GTAATTAGTTTTTAAGAATAAGGTG        | 2         |
| Oct-3/4 [+1340]                                  | reverse | AAATAAACTATTAATACCTTCCTA         | 2         |
| CTCF.bis.9.fwd                                   | forward | GTTAATTTTTTAAGGATGATAGTTTTGTGATT |           |
| CTCF.bis.9.rev                                   | reverse | AAAACCATAACAAAAACCTAAACCTTAC     |           |
| IAP.bis.fwd                                      | forward | TTGATAGTTGTGTTTTAAGTGGTAAATAAA   | 3         |
| IAP.bis.rev                                      | reverse | AAAACACCACAAACCAAATCTTCTAC       | 3         |
| IAP 5'.bis.fwd                                   | forward | ATGGGTTGTAGTTAATTAGGGAGTGATA     |           |
| IAP 5'.bis.rev                                   | reverse | CATACAATTAATCCTTCTTAACAATCTAC    |           |
| LINE1.bis.fwd                                    | forward | TAGGAAATTAGTTTGAATAGGTGAGAGGT    |           |
| LINE1.bis.rev                                    | reverse | TCAAACACTATATTACTTTAACAATCCCA    |           |
| satellite.bis.fwd                                | forward | ATACACACTTTAAAACATAAAAATATAA     | 5         |
| satellite.bis.rev                                | reverse | TTYGTTATATTTTAGGTTTTTTAGA        | 5         |
| MuERV.bis.fwd                                    | forward | GTTATTATGTGATTTGAATTA            | 3         |
| MuERV.bis.rev                                    | reverse | ACATACAAAACCATCAATAAAC           | 3         |

|               |         |                                |   |
|---------------|---------|--------------------------------|---|
| Sox30.bis.fwd | forward | AGGTGTTTTTATATTTGAGAATGATTAGAA | 4 |
| Sox30.bis.rev | reverse | ATTAAAACCCTTCCAAAACCTTAACTA    | 4 |
| Tsp50.bis.fwd | forward | TAAAAATTGTTATTGAAGTTAAGTTTGG   | 4 |
| Tsp50.bis.rev | reverse | CTAAACCCTTCTCTAAATCCCTATAC     | 4 |

### References for primer sequences

1. Chen, T., Ueda, Y., Xie, S. & Li, E. A novel Dnmt3a isoform produced from an alternative promoter localizes to euchromatin and its expression correlates with active de novo methylation. *J Biol Chem* **277**, 38746-54 (2002).
2. Sato, N., Kondo, M. & Arai, K. The orphan nuclear receptor GCNF recruits DNA methyltransferase for Oct-3/4 silencing. *Biochem Biophys Res Commun* **344**, 845-51 (2006).
3. Ramirez, M.A. et al. Transcriptional and post-transcriptional regulation of retrotransposons IAP and MuERV-L affect pluripotency of mice ES cells. *Reprod Biol Endocrinol* **4**, 55 (2006).
4. Mohn, F. et al. Concerted reprogramming of DNA methylation and Polycomb targets defines stem cell commitment and terminal neuronal differentiation. **submitted**(2007).
5. Kim, S.H. et al. Differential DNA methylation reprogramming of various repetitive sequences in mouse preimplantation embryos. *Biochem Biophys Res Commun* **324**, 58-63 (2004).



## *Sinkkonen et al.* SUPPLEMENTARY MATERIALS AND METHODS

### **mRNA microarray analysis**

Undifferentiated *Dicer*<sup>+/-</sup> and *Dicer*<sup>-/-</sup> cells were grown in the presence of LIF as described in the main text. Prior to harvesting, *Dicer*<sup>+/-</sup> and *Dicer*<sup>-/-</sup> cells were grown in triplicates for more than one week. For the rescue with the miR-290s mimics, three independently cultured *Dicer*<sup>-/-</sup> cell samples were transfected separately with either miR-290 cluster miRNA mimics or siRL, as described in Materials and Methods (main text), and harvested 24 h later. We note that at the time of study the miR-290 annotation in miRBase<sup>1</sup> was for the miR-290-5p and not miR-290-3p. The miR-290-5p mimic was therefore included in the transfection together with miR-291a-3p through miR-295-3p miRNAs, which represent the main products of their respective hairpins. The complement of miR-290-5p seed was not found to be significantly enriched in any seed motif analysis, arguing that miR-290-5p does not play a major role in ES cells.

Total RNA was isolated using Absolutely RNA Miniprep Kit (Stratagene). 5 µg of total RNA from each triplicate culture was reverse transcribed with the Affymetrix cDNA synthesis kit and cRNA was produced by *in vitro* transcription (IVT) by T7 RNA polymerase, using the Affymetrix IVT kit as per manufacturer's instructions. 20 µg of biotinylated cRNA was fragmented by heating in the presence of Mg<sup>2+</sup> (as per Affymetrix's instructions) and 15 µg of fragmented cRNA from each triplicate was hybridized to Mouse MOE430 v2.0 GeneChips<sup>TM</sup>. All arrays yielded hybridization signals of comparable intensity and quality. BioConductor<sup>2</sup> Affymetrix package of the R software was used to import the CEL files from the Affymetrix Mouse Genome 430 2.0 Array. Probe set intensities were then background-corrected, adjusted for non-specific binding and quantile normalized with the GCRMA algorithm<sup>3</sup>. GCRMA-normalized microarray data were deposited in the GEO database (GSE7141 and GSE8503).

### **Data analysis**

To extract a non-redundant set of transcripts for subsequent analyses of 3'-UTR sequences, probe sets with `_s` or `_x` tags, which map to multiple transcripts from different genes, were discarded. Then, the Affymetrix annotation from December 2006 was used

to obtain the corresponding reference sequence (RefSeq<sup>4</sup>) for each probe set. When the Affymetrix array contained probe sets for alternative RefSeq transcripts for the same gene, we only used the RefSeq transcript with the median length 3'-UTR. Through this procedure, we obtained an n-to-1 probe set to RefSeq transcript mapping. For transcripts that had multiple probe sets, we discarded those that were deficient, as indicated by their very low variance across a set of unrelated experiments performed with different cell types using the same platform (Affymetrix Mouse Genome 430 2.0). Finally, the log<sub>2</sub> intensities of the probe sets corresponding to a given transcript were averaged to obtain a transcript level measurement. We used Limma<sup>5</sup> to estimate the fold change and the corresponding p-value in the three replicate experiments for each condition.

To identify those motifs whose frequency in up-regulated (in *Dicer*<sup>-/-</sup>) or down-regulated (in *Dicer*<sup>-/-</sup> ES cells transfected with miRNA mimics of the miR-290 family) 3'-UTRs is significantly different relative to the frequency in the entire set of 3'-UTRs, we extracted the set of transcripts up-regulated in the *Dicer*<sup>-/-</sup> cells (p-value < 0.001) and computed the relative frequency of all 7-mers in the 3'-UTRs of these transcripts compared with the entire set of 3'-UTRs represented on the microarray. For each 7-mer, we then plotted the log<sub>2</sub>(number of occurrences in up-regulated 3'-UTRs) on the x-axis, and the enrichment in up-regulated 3'-UTRs compared to the entire set of 3'-UTRs on the y-axis (Fig. 1b and 1e). We then used a Bayesian model that we previously introduced for comparing miRNA frequencies between samples<sup>6</sup>. Briefly, we estimate the posterior probabilities of the model that assumes that the frequency of a given motif is different between two sets of transcripts (call this "different" model), and the model that assumes that the frequency is the same (call this "same" model), given the observed counts m and n of the motif among M and N total motifs in the two samples. We selected as significant those motifs that were enriched in the up-regulated or down-regulated set, respectively, with a posterior probability of the "different" model > 0.99

### **miRNA microarray analysis**

Total RNA from two independent cultures of *Dicer*<sup>+/-</sup> cells and single culture of *Dicer*<sup>-/-</sup> cells was extracted using MirVana miRNA Isolation Kit (Ambion). 5 µg of each RNA preparation was used for miRNA miRCURY<sup>TM</sup> microarray analysis as a service by

Exiqon (Vedbäck, Denmark). As a control, a mixture of 5 µg of total RNA originating from 10 mouse tissues (Ambion) supplemented with 500 ng of total RNA from *Dicer*<sup>+/-</sup> cells was labeled with Hy5 (spectrally equivalent to Cy5) and co-hybridized with either the *Dicer*<sup>+/-</sup> or the *Dicer*<sup>-/-</sup> RNA samples, which were labeled with Hy3 (spectrally equivalent to Cy3). The expression level of reliably detected miRNAs was calculated relative to the levels in *Dicer*<sup>+/-</sup> sample as well as relative to the level in the control mixture of total RNAs (reference sample). Most miRNA probes exhibited hybridization signal also with *Dicer*<sup>-/-</sup> samples, suggesting that the arrays also detect precursors of miRNAs or cross-hybridize to unrelated RNAs. The original data are available upon request.

## REFERENCES

1. Griffiths-Jones, S., Grocock, R.J., van Dongen, S., Bateman, A. & Enright, A.J. miRBase: microRNA sequences, targets and gene nomenclature. *Nucleic Acids Res* **34**, D140-4 (2006).
2. Gentleman, R.C. et al. Bioconductor: open software development for computational biology and bioinformatics. *Genome Biol* **5**, R80 (2004).
3. Wu, Z., Irizarry, A.R., Gentleman, R., Martinez-Murillo, F. & Spencer, F.M. A Model-Based Background Adjustment for Oligonucleotide Expression Arrays. *JASA* **99**, 909-17 (2004).
4. Pruitt, K.D., Katz, K.S., Sicotte, H. & Maglott, D.R. Introducing RefSeq and LocusLink: curated human genome resources at the NCBI. *Trends Genet* **16**, 44-7 (2000).
5. Smyth, G.K. Linear models and empirical bayes methods for assessing differential expression in microarray experiments. *Stat Appl Genet Mol Biol* **3**, Article3 (2004).
6. Landgraf, P. et al. A Mammalian microRNA Expression Atlas Based on Small RNA Library Sequencing. *Cell* **129**, 1401-14 (2007).
7. Kanellopoulou, C. et al. Dicer-deficient mouse embryonic stem cells are defective in differentiation and centromeric silencing. *Genes Dev* **19**, 489-501 (2005).

8. Deussing, J. et al. Identification and characterization of a dense cluster of placenta-specific cysteine peptidase genes and related genes on mouse chromosome 13. *Genomics* **79**, 225-40 (2002).
9. Hough, S.R., Clements, I., Welch, P.J. & Wiederholt, K.A. Differentiation of mouse embryonic stem cells after RNA interference-mediated silencing of OCT4 and Nanog. *Stem Cells* **24**, 1467-75 (2006).
10. Loh, Y.H. et al. The Oct4 and Nanog transcription network regulates pluripotency in mouse embryonic stem cells. *Nat Genet* **38**, 431-40 (2006).
11. Zeng, F., Baldwin, D.A. & Schultz, R.M. Transcript profiling during preimplantation mouse development. *Dev Biol* **272**, 483-96 (2004).
12. Schmitter, D. et al. Effects of Dicer and Argonaute down-regulation on mRNA levels in human HEK293 cells. *Nucleic Acids Res* **34**, 4801-15 (2006).
13. Weber, M. & Schubeler, D. Genomic patterns of DNA methylation: targets and function of an epigenetic mark. *Curr Opin Cell Biol* **19**, 273-80 (2007).
14. Svoboda, P., Stein, P., Filipowicz, W. & Schultz, R.M. Lack of homologous sequence-specific DNA methylation in response to stable dsRNA expression in mouse oocytes. *Nucleic Acids Res* **32**, 3601-6 (2004).
